# Supplementary material for: Novel Mouse Model of Murine Cytomegalovirus–Induced Adaptive NK Cells
Source: PubMed Central journal article supplement (PMC9636593; doi:10.4049/immunohorizons.2100113), 2022-01-14
Supplement: NIHMS1846483-supplement-1.pdf [file NIHMS1846483-supplement-1.pdf]

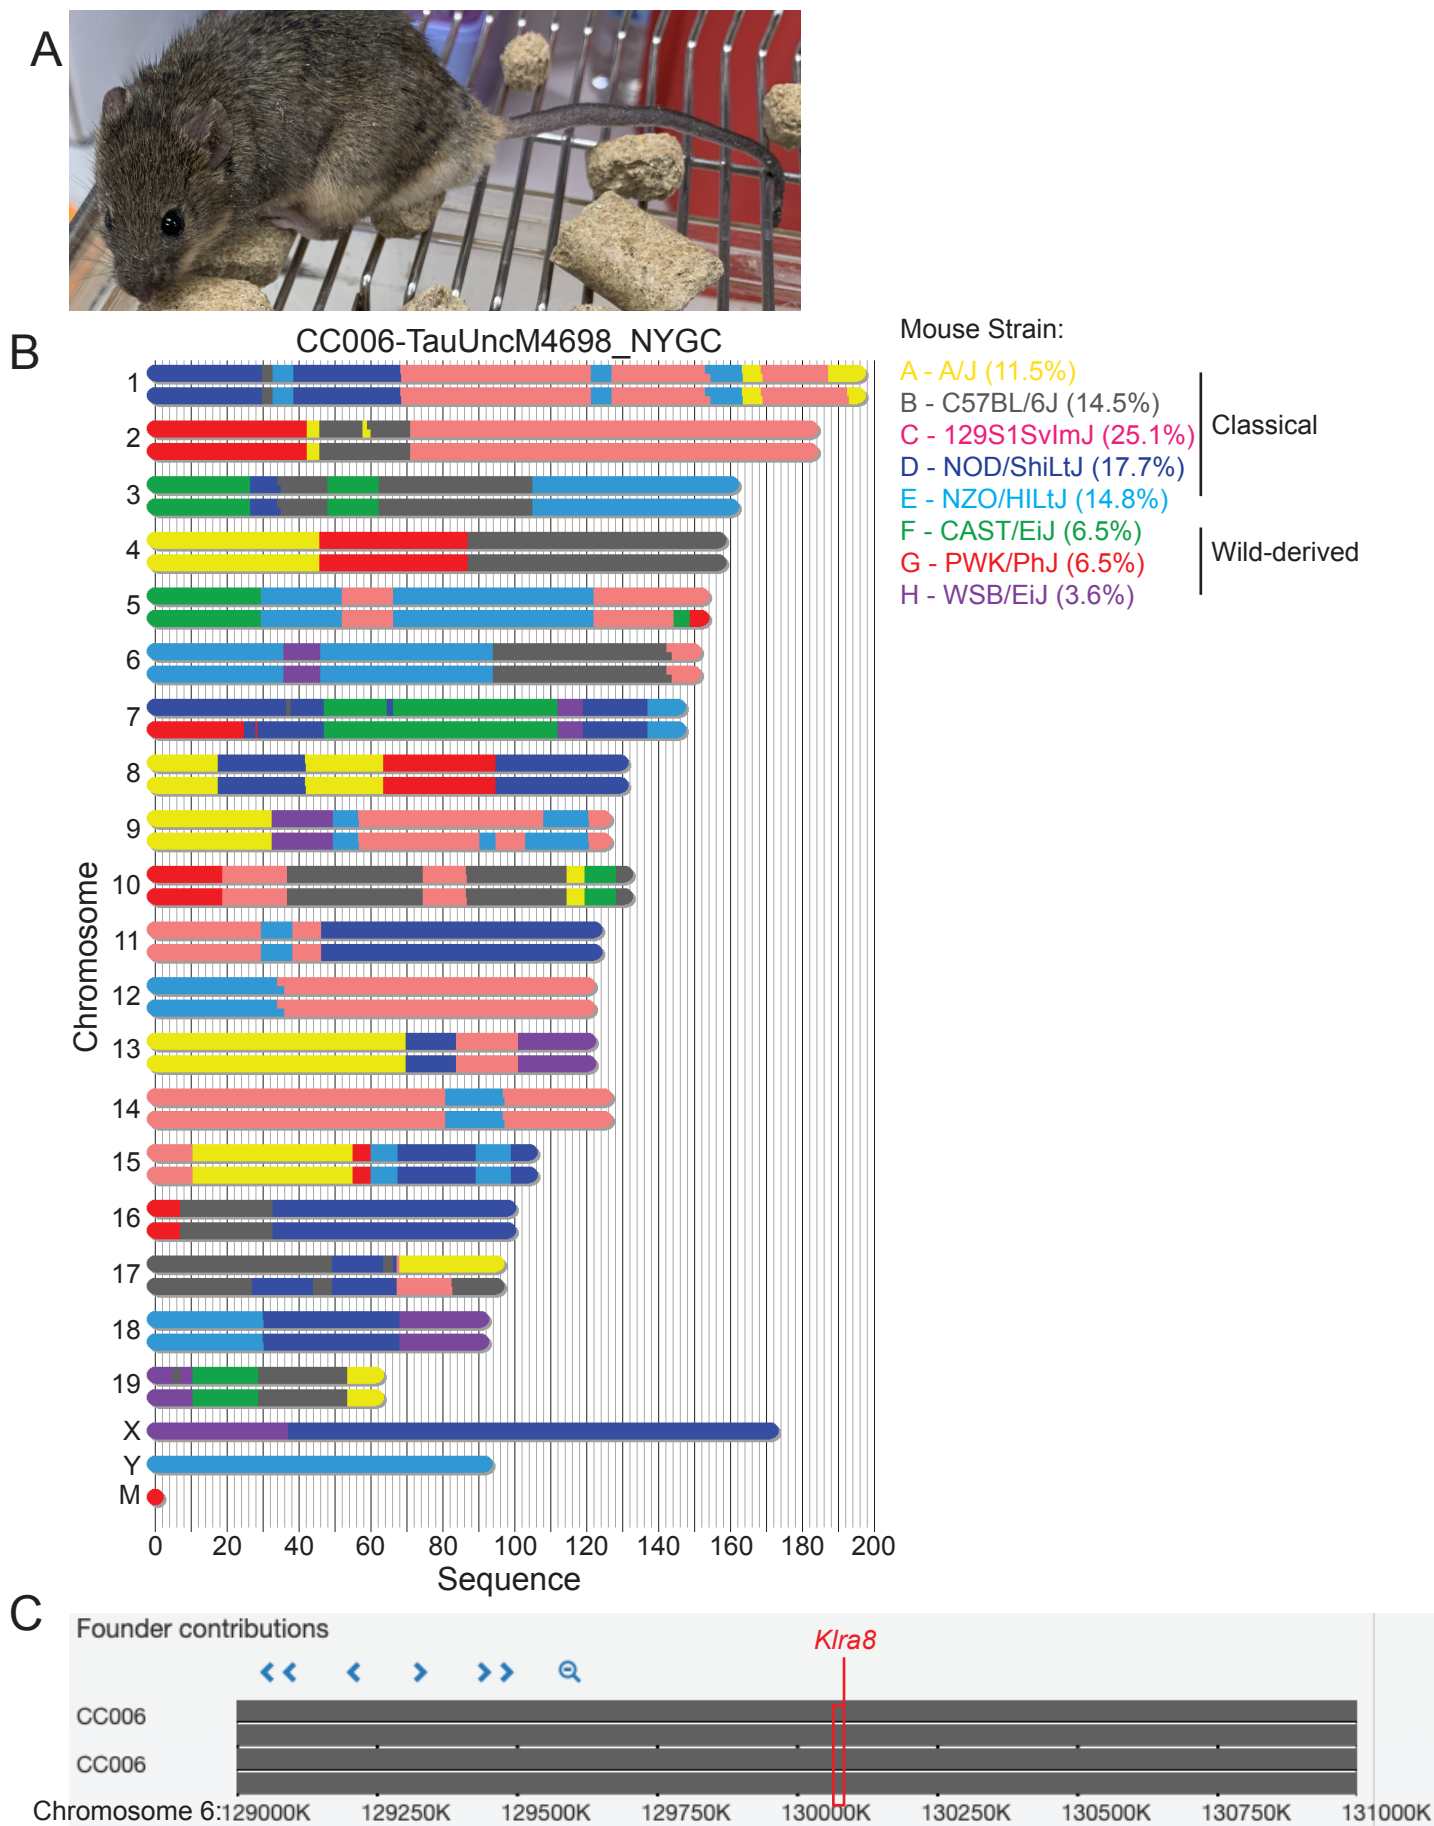

**Supplemental Figure 1: Phenotype and genotype of CC006 mice. (A)** Image of CC006 mouse. **(B)** Genetic founder composition of CC006 mice. **(C)** Genetic founder composition of *Ly49H* locus in CC006 mice.

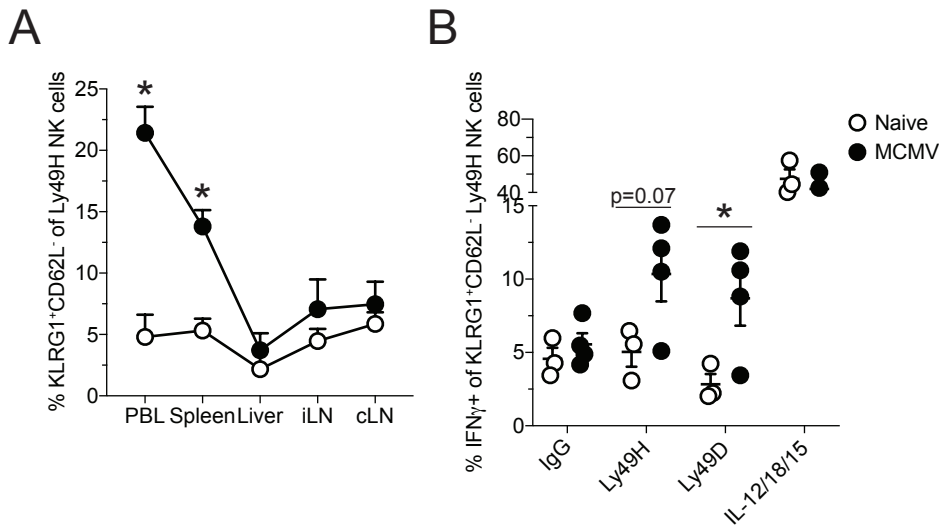

**Supplemental Figure 2: Long-term maintenance and function of adaptive NK cells in CC006 mice.** The frequency of (A) KLRG1<sup>+</sup> CD62L<sup>-</sup> cells among Ly49H NK cells [in the PBL, spleen, liver, iLN, and cLN] and (B) IFN $\gamma$ <sup>+</sup> of splenic KLRG1<sup>+</sup> CD62L<sup>-</sup> Ly49H NK cells [following stimulation with control IgG, aLy49H, aLy49D, and IL-12+IL-18+IL-15] at D200 post-infection MCMV infected and age-matched naïve mice. Data are from a single experiment with 3-4 mice per group. Error bars represent standard error of the mean. \* = p-value < 0.05.

## D7 post-immunization PBL

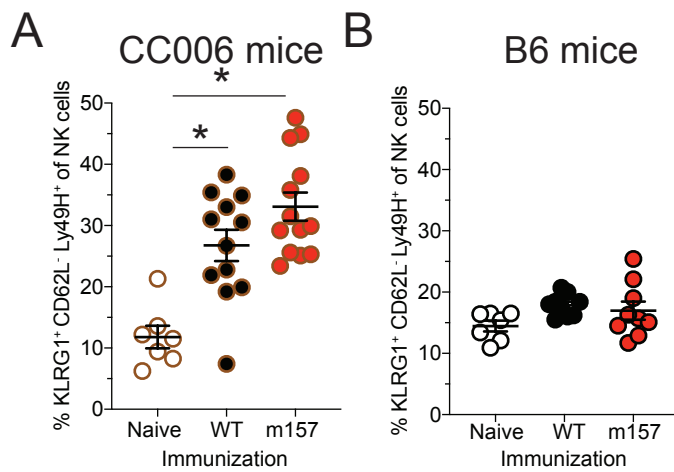

## D33 post-immunization (D3 post-MCMV) Spleen

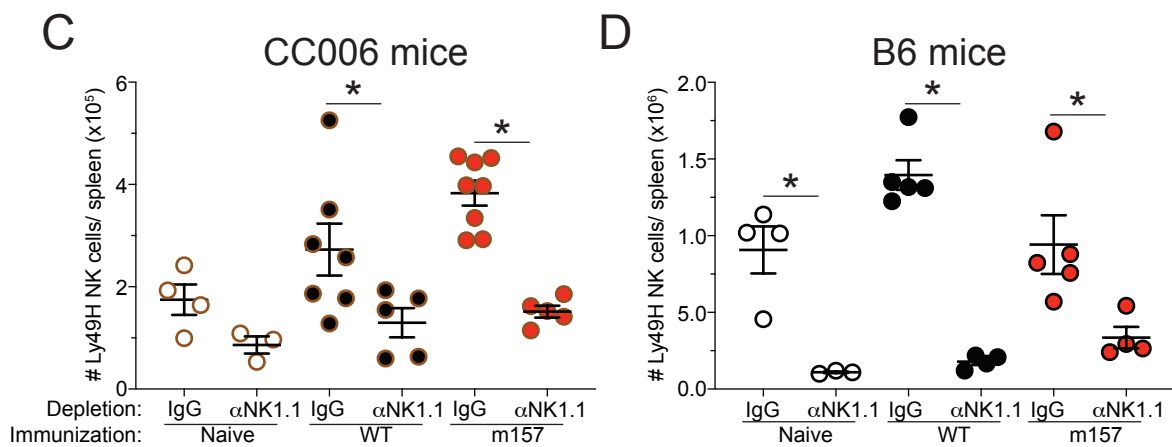

**Supplemental Figure 3: Assessment of NK cell activation following immunization and determination of depletion during MCMV challenge.** The frequency of KLRG1<sup>+</sup>CD62L<sup>-</sup> Ly49H<sup>+</sup> cells among NK cells at D7 post-immunization in naïve, B6 immunized, and B6-m157 immunized (A) CC006 and (B) B6 mice. The number of Ly49H NK cells per spleen of NK depleted and non-depleted naïve, B6 immunized, and B6-m157 immunized (A) CC006 and (D) B6 mice. Data are from a 1-2 experiments with 3-13 mice per group. Error bars represent standard error of the mean. \*= $p$ -value<0.05.
